# Supplementary material for: Evolutionary and Gene Expression Analyses Reveal New Insights into the Role of <i>LSU</i> Gene-Family in Plant Responses to Sulfate-Deficiency
Source: Preprints.org preprint supplement (doi:10.20944/preprints202204.0208.v1), 2022-04-22
Supplement: Supplementary file 1 [file supplementary]

## Sheet: LSU genes
gene_id	species	class	group
Aco007591	Ananas comosus	monocotyledons	A
evm.TU.AsparagusV1_04.3568.V1.1	Asparagus officinalis	monocotyledons	A
evm.TU.AsparagusV1_Unassigned.1193.V1.1	Asparagus officinalis	monocotyledons	A
Asa7G03174	Allium sativum	monocotyledons	A
AET1Gv20463300	Aegilops tauschii	monocotyledons	A
Bradi3g02810	Brachypodium distachyon	monocotyledons	A
Bradi3g30730	Brachypodium distachyon	monocotyledons	A
CALSI_Maker00017730	Calamus simplicifolius	monocotyledons	A
CALSI_Maker00021627	Calamus simplicifolius	monocotyledons	A
CALSI_Maker00021636	Calamus simplicifolius	monocotyledons	A
CALSI_Maker00023591	Calamus simplicifolius	monocotyledons	A
CALSI_Maker00023631	Calamus simplicifolius	monocotyledons	A
GWHGAORA018573	Cenchrus purpureus	monocotyledons	A
GWHGAORA052041	Cenchrus purpureus	monocotyledons	A
GWHGAORA058174	Cenchrus purpureus	monocotyledons	A
DDU469G0250	Dioscorea dumetorum	monocotyledons	A
DDU751G0004	Dioscorea dumetorum	monocotyledons	A
Dexi1A01G0002750	Digitaria exilis	monocotyledons	A
Dexi1B01G0002770	Digitaria exilis	monocotyledons	A
Dexi9B01G0018110	Digitaria exilis	monocotyledons	A
Horvu_MOREX_1H01G300100	Hordeum vulgare	monocotyledons	A
Horvu_MOREX_6H01G101200	Hordeum vulgare	monocotyledons	A
V3.Lp_chr1_0G9816	Lolium perenne	monocotyledons	A
V3.Lp_chr3_0G23478	Lolium perenne	monocotyledons	A
Ma01_g10040	Musa acuminata	monocotyledons	A
Ma01_g10090	Musa acuminata	monocotyledons	A
Ma05_g22280	Musa acuminata	monocotyledons	A
Misin01G181400	Miscanthus sinensis	monocotyledons	A
Misin02G175300	Miscanthus sinensis	monocotyledons	A
GWHGAZTO009332	Oryza alta	monocotyledons	A
Os02g0129800	Oryza sativa ssp. Japonica	monocotyledons	A
Os10g0509401	Oryza sativa ssp. Japonica	monocotyledons	A
Os10g0509600	Oryza sativa ssp. Japonica	monocotyledons	A
Ot_Chr1_g09462	Oropetium thomaeum	monocotyledons	A
Ot_Chr1_gn31947	Oropetium thomaeum	monocotyledons	A
PH02Gene21413	Phyllostachys edulis	monocotyledons	A
PH02Gene35849	Phyllostachys edulis	monocotyledons	A
Pahal.1G024000	Panicum hallii	monocotyledons	A
Pahal.9G192400	Panicum hallii	monocotyledons	A
Sobic.001G198000	Sorghum bicolor	monocotyledons	A
Sobic.003G237500	Sorghum bicolor	monocotyledons	A
Sobic.004G028200	Sorghum bicolor	monocotyledons	A
GWHGASIY002226	Secale cereale	monocotyledons	A
GWHGASIY009272	Secale cereale	monocotyledons	A
Seita.1G099500	Setaria italica	monocotyledons	A
Seita.9G195800	Setaria italica	monocotyledons	A
Spipo11G0021600	Spirodela polyrhiza	monocotyledons	A
Spipo1G0108900	Spirodela polyrhiza	monocotyledons	A
Spipo1G0109000	Spirodela polyrhiza	monocotyledons	A
Sspon.01G0026550-1A	Saccharum spontaneum	monocotyledons	A
Sspon.01G0026550-2C	Saccharum spontaneum	monocotyledons	A
Sspon.04G0019310-1P	Saccharum spontaneum	monocotyledons	A
Sspon.04G0019310-2B	Saccharum spontaneum	monocotyledons	A
Sevir.1G098900	Setaria viridis	monocotyledons	A
Sevir.9G195400	Setaria viridis	monocotyledons	A
TraesCS1A03G0484600	Triticum aestivum	monocotyledons	A
TraesCS1B03G0587700	Triticum aestivum	monocotyledons	A
TraesCS1D03G0456700	Triticum aestivum	monocotyledons	A
TraesCS6A03G0192500	Triticum aestivum	monocotyledons	A
TraesCS6B03G0289700	Triticum aestivum	monocotyledons	A
TRIDC1AG027410	Triticum dicoccoides	monocotyledons	A
TRIDC1BG033640	Triticum dicoccoides	monocotyledons	A
TRITD1Av1G117440	Triticum turgidum	monocotyledons	A
TRITD1Bv1G118370	Triticum turgidum	monocotyledons	A
TRITD6Av1G021710	Triticum turgidum	monocotyledons	A
TRITD6Bv1G036780	Triticum turgidum	monocotyledons	A
HPP92_008910	Vanilla planifolia	monocotyledons	A
Zjn_sc00037.1.g05350.1.sm.mk	Zoysia japonica ssp. nagirizaki	monocotyledons	A
Zjn_sc00092.1.g01990.1.am.mk	Zoysia japonica ssp. nagirizaki	monocotyledons	A
Zm00001eb043810	Zea mays	monocotyledons	A
Zm00001eb220550	Zea mays	monocotyledons	A
Zm00001eb231110	Zea mays	monocotyledons	A
Aa31LG11G3910	Aethionema arabicum	eudicotyledons	B
Aa31LG4G18060	Aethionema arabicum	eudicotyledons	B
Atru.chr12.2499	Acer truncatum	eudicotyledons	B
Atru.chr12.2523	Acer truncatum	eudicotyledons	B
AL5G29410	Arabidopsis lyrata	eudicotyledons	B
AL5G29420	Arabidopsis lyrata	eudicotyledons	B
AL6G36260	Arabidopsis lyrata	eudicotyledons	B
AL6G36270	Arabidopsis lyrata	eudicotyledons	B
Ah.13g071060	Amaranthus hybridus	eudicotyledons	B
Ah.13g071070	Amaranthus hybridus	eudicotyledons	B
AT3G49570	Arabidopsis thaliana	eudicotyledons	B
AT3G49580	Arabidopsis thaliana	eudicotyledons	B
AT5G24655	Arabidopsis thaliana	eudicotyledons	B
AT5G24660	Arabidopsis thaliana	eudicotyledons	B
BcaB01g00694	Brassica carinata	eudicotyledons	B
BcaB01g00695	Brassica carinata	eudicotyledons	B
BcaB01g00696	Brassica carinata	eudicotyledons	B
BcaC03g17951	Brassica carinata	eudicotyledons	B
BcaC07g39418	Brassica carinata	eudicotyledons	B
BcaC07g39419	Brassica carinata	eudicotyledons	B
BcaC07g39421	Brassica carinata	eudicotyledons	B
BcaC09g49963	Brassica carinata	eudicotyledons	B
BcaNung02004	Brassica carinata	eudicotyledons	B
A02p40150	Brassica napus	eudicotyledons	B
A06p18160	Brassica napus	eudicotyledons	B
A06p18190	Brassica napus	eudicotyledons	B
A06p35480	Brassica napus	eudicotyledons	B
C02p60110	Brassica napus	eudicotyledons	B
C07p43060	Brassica napus	eudicotyledons	B
C08p24550	Brassica napus	eudicotyledons	B
BolC2t12066H	Brassica oleracea	eudicotyledons	B
BolC7t44833H	Brassica oleracea	eudicotyledons	B
BolC8t50073H	Brassica oleracea	eudicotyledons	B
BolC8t50074H	Brassica oleracea	eudicotyledons	B
BraA02t08981Z	Brassica rapa	eudicotyledons	B
BraA06t24903Z	Brassica rapa	eudicotyledons	B
BraA06t26471Z	Brassica rapa	eudicotyledons	B
EL10Ac3g05128	Beta vulgaris	eudicotyledons	B
EL10Ac3g05129	Beta vulgaris	eudicotyledons	B
Ca_16840_v3	Cicer arietinum L.	eudicotyledons	B
Haze_00337	Corylus avellana	eudicotyledons	B
Ciclev10022951m.g	Citrus clementina	eudicotyledons	B
CARHR158580	Cardamine hirsuta	eudicotyledons	B
CARHR158590	Cardamine hirsuta	eudicotyledons	B
CARHR188800	Cardamine hirsuta	eudicotyledons	B
CiPaw.06G038100	Carya illinoinensis	eudicotyledons	B
ClCG01G000030	Citrullus lanatus	eudicotyledons	B
COL.COLO4_14401	Corchorus olitorius	eudicotyledons	B
COL.COLO4_14402	Corchorus olitorius	eudicotyledons	B
Cpa.g.sc3.189	Carica papaya	eudicotyledons	B
AUR62005945	Chenopodium quinoa	eudicotyledons	B
AUR62005946	Chenopodium quinoa	eudicotyledons	B
AUR62028119	Chenopodium quinoa	eudicotyledons	B
Carub.0005s1590	Capsella rubella	eudicotyledons	B
Carub.0005s1591	Capsella rubella	eudicotyledons	B
Carub.0006s2251	Capsella rubella	eudicotyledons	B
Carub.0006s2252	Capsella rubella	eudicotyledons	B
CsaV3_5G000160	Cucumis sativus L.	eudicotyledons	B
Duzib068G1330	Durio zibethinus	eudicotyledons	B
Duzib084G1005	Durio zibethinus	eudicotyledons	B
Duzib205G0505	Durio zibethinus	eudicotyledons	B
Thhalv10005368m.g	Eutrema salsugineum	eudicotyledons	B
Thhalv10010815m.g	Eutrema salsugineum	eudicotyledons	B
Gohir.A08G106600	Gossypium hirsutum	eudicotyledons	B
Gohir.A08G106800	Gossypium hirsutum	eudicotyledons	B
Gohir.D08G117850	Gossypium hirsutum	eudicotyledons	B
Gohir.D08G117900	Gossypium hirsutum	eudicotyledons	B
Glyma.04G225500	Glycine max	eudicotyledons	B
Glyma.06G139300	Glycine max	eudicotyledons	B
Glyma.14G188300	Glycine max	eudicotyledons	B
Gorai.004G126400	Gossypium raimondii	eudicotyledons	B
Gorai.004G126500	Gossypium raimondii	eudicotyledons	B
Lalb_Chr04g0252571	Lupinus albus	eudicotyledons	B
Lalb_Chr08g0239391	Lupinus albus	eudicotyledons	B
Lalb_Chr10g0102971	Lupinus albus	eudicotyledons	B
Lalb_Chr11g0067571	Lupinus albus	eudicotyledons	B
Lj1g0021256	Lotus japonicus	eudicotyledons	B
LjContig00155g0019595	Lotus japonicus	eudicotyledons	B
Manes.01G002300	Manihot esculenta	eudicotyledons	B
Medtr3g093400	Medicago truncatula	eudicotyledons	B
PGR142G3642	Punica granatum	eudicotyledons	B
Psat5g070520	Pisum sativum	eudicotyledons	B
Psat5g070560	Pisum sativum	eudicotyledons	B
Potri.012G004500	Populus trichocarpa	eudicotyledons	B
Potri.015G000500	Populus trichocarpa	eudicotyledons	B
Phvul.008G187900	Phaseolus vulgaris	eudicotyledons	B
Phvul.009G040500	Phaseolus vulgaris	eudicotyledons	B
QL09p005975	Quercus lobata	eudicotyledons	B
QL11p009417	Quercus lobata	eudicotyledons	B
Sabra12G0000400	Salix brachista	eudicotyledons	B
Sabra15G0000300	Salix brachista	eudicotyledons	B
Sc14g0006700	Simmondsia chinensis	eudicotyledons	B
Sed0013785	Sechium edule	eudicotyledons	B
Sp2g22730	Schrenkiella parvula	eudicotyledons	B
Sp5g12530	Schrenkiella parvula	eudicotyledons	B
Sp5g12540	Schrenkiella parvula	eudicotyledons	B
SpUn0007_0020	Schrenkiella parvula	eudicotyledons	B
Thecc.03G212200	Theobroma cacao	eudicotyledons	B
Thecc.03G212300	Theobroma cacao	eudicotyledons	B
THA.LOC104798994	Tarenaya hassleriana	eudicotyledons	B
TPR.G35911	Trifolium pratense	eudicotyledons	B
TWI81G0192	Tripterygium wilfordii	eudicotyledons	B
TWI81G0266	Tripterygium wilfordii	eudicotyledons	B
VMungo1309G1451	Vigna mungo	eudicotyledons	B
Actinidia18691	Actinidia chinensis	eudicotyledons	C
Actinidia34289	Actinidia chinensis	eudicotyledons	C
MSTRG.26951	Avicennia marina	eudicotyledons	C
Aqoxy5G04393	Aquilegia oxysepala	eudicotyledons	C
Asa4G03928	Allium sativum	monocotyledons	C
ATR0579G061	Amborella trichopoda	basal_angiosperm	C
CSS0002942	Camellia sinensis var. sinensis	eudicotyledons	C
CSS0005275	Camellia sinensis var. sinensis	eudicotyledons	C
CAN.G303.61	Capsicum annuum	eudicotyledons	C
CAN.G303.62	Capsicum annuum	eudicotyledons	C
CAN.G65.142	Capsicum annuum	eudicotyledons	C
CANSAT21G0934	Cannabis sativa	eudicotyledons	C
CANSAT21G1431	Cannabis sativa	eudicotyledons	C
Cc02_g00580	Coffea canephora	eudicotyledons	C
CDE04G0378	Ceratophyllum demersum	basal_angiosperm	C
CDE11G0526	Ceratophyllum demersum	basal_angiosperm	C
DCAR_010556	Daucus carota	eudicotyledons	C
Dinv17275	Davidia involucrata	eudicotyledons	C
Dinv29190	Davidia involucrata	eudicotyledons	C
ECA232G1694	Erigeron canadensis	eudicotyledons	C
ECA233G1855	Erigeron canadensis	eudicotyledons	C
Eucgr.K00481	Eucalyptus grandis	eudicotyledons	C
Eucgr.K00482	Eucalyptus grandis	eudicotyledons	C
Eucgr.K00529	Eucalyptus grandis	eudicotyledons	C
Eucgr.K00530	Eucalyptus grandis	eudicotyledons	C
Migut.F00119	Erythranthe guttata	eudicotyledons	C
Migut.F00121	Erythranthe guttata	eudicotyledons	C
Migut.F00966	Erythranthe guttata	eudicotyledons	C
Migut.F00967	Erythranthe guttata	eudicotyledons	C
FAN03G2343	Fragaria x ananassa	eudicotyledons	C
FAN10G2693	Fragaria x ananassa	eudicotyledons	C
FAN10G4285	Fragaria x ananassa	eudicotyledons	C
FvH4_7g33340	Fragaria vesca	eudicotyledons	C
HanXRQChr08g0225771	Helianthus annuus	eudicotyledons	C
HanXRQChr08g0225851	Helianthus annuus	eudicotyledons	C
HanXRQChr08g0225861	Helianthus annuus	eudicotyledons	C
HanXRQChr08g0225881	Helianthus annuus	eudicotyledons	C
HanXRQChr16g0499781	Helianthus annuus	eudicotyledons	C
Hma1.2p1_0115F.1_g055840	Hydrangea macrophylla	eudicotyledons	C
Lsat_1_v5_gn_2_3421	Lactuca sativa	eudicotyledons	C
Lsat_1_v5_gn_8_4241	Lactuca sativa	eudicotyledons	C
Lsat_1_v5_gn_8_4301	Lactuca sativa	eudicotyledons	C
MBI04_g21753_MAGBIO	Magnolia biondii	basal_angiosperm	C
MBI04_g09823_MAGBIO	Magnolia biondii	basal_angiosperm	C
MBI12_g23072_MAGBIO	Magnolia biondii	basal_angiosperm	C
MBI12_g23073_MAGBIO	Magnolia biondii	basal_angiosperm	C
MBI12_g33141_MAGBIO	Magnolia biondii	basal_angiosperm	C
MD01G1231600	Malus domestica	eudicotyledons	C
MD07G1303600	Malus domestica	eudicotyledons	C
Nn3g18090	Nelumbo nucifera	eudicotyledons	C
Nitab4.5_0000115g0190	Nicotiana tabacum	eudicotyledons	C
Nitab4.5_0002691g0070	Nicotiana tabacum	eudicotyledons	C
Nitab4.5_0002691g0080	Nicotiana tabacum	eudicotyledons	C
Nitab4.5_0002867g0010	Nicotiana tabacum	eudicotyledons	C
Nitab4.5_0007121g0010	Nicotiana tabacum	eudicotyledons	C
Oeu017357.1	Olea europaea	eudicotyledons	C
Oeu055427.1	Olea europaea	eudicotyledons	C
Oeu063749.1	Olea europaea	eudicotyledons	C
Peaxi162Scf00007g00254	Petunia axillaris	eudicotyledons	C
Peaxi162Scf00542g00013	Petunia axillaris	eudicotyledons	C
Peaxi162Scf00685g10014	Petunia axillaris	eudicotyledons	C
Peaxi162Scf00815g00116	Petunia axillaris	eudicotyledons	C
Peaxi162Scf01650g00008	Petunia axillaris	eudicotyledons	C
Prupe.2G322300	Prunus persica	eudicotyledons	C
PSO017G3293	Papaver somniferum	eudicotyledons	C
PSO541G0132	Papaver somniferum	eudicotyledons	C
PSO675G1709	Papaver somniferum	eudicotyledons	C
RcHm_v2.0_Chr1g0383321	Rosa chinensis	eudicotyledons	C
SGA_v2.0_scaffold351G49675	Striga asiatica	eudicotyledons	C
SGA_v2.0_scaffold44G16873	Striga asiatica	eudicotyledons	C
SalBow4G1643	Salvia bowleyana	eudicotyledons	C
SalBow4G2332	Salvia bowleyana	eudicotyledons	C
Solyc03g096760.1	Solanum lycopersicum	eudicotyledons	C
Solyc03g096770.1	Solanum lycopersicum	eudicotyledons	C
Solyc03g096780.1	Solanum lycopersicum	eudicotyledons	C
Solyc06g072990.1	Solanum lycopersicum	eudicotyledons	C
Sopen03g027490	Solanum pennellii	eudicotyledons	C
Sopen03g027500	Solanum pennellii	eudicotyledons	C
Sopen03g027520	Solanum pennellii	eudicotyledons	C
Sopen06g029340	Solanum pennellii	eudicotyledons	C
PGSC0003DMG400000545	Solanum tuberosum	eudicotyledons	C
PGSC0003DMG400000546	Solanum tuberosum	eudicotyledons	C
PGSC0003DMG400000547	Solanum tuberosum	eudicotyledons	C
PGSC0003DMG400027025	Solanum tuberosum	eudicotyledons	C
TAR374G1397	Trochodendron aralioides	eudicotyledons	C
TAR375G0964	Trochodendron aralioides	eudicotyledons	C
unitig_60.g25635	Utricularia gibba	eudicotyledons	C
vmacro06476	Vaccinium macrocarpon	eudicotyledons	C
vmacro06477	Vaccinium macrocarpon	eudicotyledons	C
Zosma06g08460	Zostera marina	monocotyledons	C
SEGI_09109	Sequoiadendron giganteum	gymnosperm	outgroup
SEGI_32370	Sequoiadendron giganteum	gymnosperm	outgroup
SEGI_32433	Sequoiadendron giganteum	gymnosperm	outgroup
SEGI_37007	Sequoiadendron giganteum	gymnosperm	outgroup
