# Supplementary material for: Evolutionary and Gene Expression Analyses Reveal New Insights into the Role of <i>LSU</i> Gene-Family in Plant Responses to Sulfate-Deficiency
Source: Preprints.org preprint supplement (doi:10.20944/preprints202204.0208.v1), 2022-04-22
Supplement: Supplementary file 3 [file Table S2.xlsx]

## Sheet: Hoja1
	Supplementary Table 2. Primers used in quantitative real-time PCR analysis
	Species	Gene	Primer Forward / Primer Reverse
	Arabidopsis thaliana	LSU1 AT3G49580	5´ GGATGAGCTAAGGAGGAGGA 3´ 5´ TTCGCTGCCACAACTTAATC 3´
		LSU2 AT5G24660	5´ AGAACGGAGAGATGGAGAAAGCTG 3´ 5´ TAATTCTACGGAGAGGCAGAGGCA 3´
		LSU3 AT3G49570	5´ ACGGAGAGTTGGAGAGAGAAATGG 3´ 5´ ACGCGCCTGATCTAAAGACTC 3´
		LSU4 AT5G24655	5´ AAAGAGAGAAAATGGGAAAAGGAG 3´ 5´ AGTGTGGTAATCACGAGCCT 3´
		Clathrin adaptor complex subunit AT4G24550	5´ AATACGCGCTGAGTTCCCTT 3´ 5´ AGCACCGGGTTCTAACTC 3´
		SULTR1.2 AT1G78000	5' TCCAGGCTTGCTGTCCAAAAC 3' 5' ACACTTGACCCCTTGGTGTGATAG 3'
		SULTR4.2 AT3G12520	5' ATTGTTCGAATCGATGCTCCC 3' 5' CCCTTGCTTGTGTGTTTGTCG 3'
		SiR AT5G04590	5' TTGAGCCTTCCCGTGAACTTCC 3' 5' AACCATGCACCATCTCCCTGTTC 3'
		APR3 AT4G21990	5’ AGTTTGTCCGGGAAGAGATCCT 3’ 5’ GTCATTCCCAAACTTCTCAAGAGC 3’
		APR2 AT1G62180	5' TGCTCCTGAAGTTGAAGAGAAAGG 3' 5' GCGATTTGGTCTCCGAATCTCTC 3'
		BCAT4 AT3G19710	5' TCCTGTGAGTGTTTCGGATGA 3' 5' TACTGAAGAACAGCAGCGCA 3'
		MAM1 AT5G23010	5' GGGGCATATGTGATCAATGGGGTTT 3' 5' ACAGTTCGCTCCAACTATGGGCTTA 3'
		MSA1 AT1G36370	5' GAAAGCAGGGCCATCACTCT 3' 5' AATGCAATGGCAAGAGCAGC 3'
		SPX1 AT5G20150	5' TGCCGCCTCTACAGTTAAATG 3' 5' TGGCTTCTTGCTCCAACAATGG 3'
		SDI1 AT5G48850	5' GGAAGATTGGTTCTTGACGATG 3' 5' CTCTTCAAGCCCAAGAACAAA 3'
		SDI2 AT1G04770	5' CGAGAAGGAAACCTCTAGGATC 3' 5' CTTGTTTGCATCTGGCTCTATC 3'
	Solanum lycopersicum	Solyc03g096760.1	5´ GCACAAAAACTTGTCCAGTCAG 3´ 5´ TAGAGCCAAACCAAACCAAATC 3´
		Solyc03g096770.1	5´ TCTTTGGCTCAGAAACTTCTCC 3´ 5´ TGTCCTCTCTAGACTAATCGGCTTAT 3´
		Solyc03g096780.1	5´ GTACCTTCCGGCAAAGCAAATCCT 3´ 5´ ATCAACAGCTTCCGCCTCAAGTTC 3´
		Solyc06g072990.1	5` TGGCTCCGACTATAGCAACA 3' 5´ CCTCCAGCTCTTCGTTTCTCTTTC 3`
		TIP4 Solyc01g107420	5´ ATGGAGTTTTTGAGTCTTCTG 3´ 5´ GCTGCGTTTCTGGCTTAG 3´
		APR2	5' TTCAGCCATTGGATAGGCCTCAAC 3' 5' AAGTCCTCTGCCTCAACACTCTCT 3'
		SULTR1.2	5' AACCGAGGTCTAGGAAGCTTGT 3' 5' ACTGCCCATGAAGGCGTAAACT 3'
	Triticum aestivum	TaLSU1 TraesCS1A02G179400 TraesCS1B02G201100 TraesCS1D02G177700	5´ GAGATTCGGTTCGTCAGTGAAG 3´ 5´ ATGACGCAGGCCATGGAGTA 3´
		TaLSU2 TraesCS6A02G085000 TraesCS6B02G117300	5´ GGAGGTGGCGCTGCTGCG 3´ 5´ CCCGCGCGAGCTCCTGGA 3´
		E256 TraesCS4A02G414200	5´ATTAACGAAACCAATCGACGGA 3´ 5´ CGGGCCCGAAGAGAGTCT 3´
		APR1 TraesCS2A02G225200	5' ATCAAGTACCCGTCCGAGAAG 3' 5' GATCCATCCTCTCTCGCTACC 3'
		SHM7 TraesCS3A02G385600	5' AGCTCGGTAACCAGGTTGAG 3' 5' TCCCATTTTGTGTGAACAGC 3'
	Supplementary Table. Primers used in genotyping of T-DNA insertion lines
	LBb1.3	5' ATTTTGCCGATTTCGGAAC 3'
	SALK_031648 LP	5' CAGCTCATTGGGGCTATAATG 3'
	SALK_031648 RP	5' TCGCAAAAATCAATCGGTAAC 3'
